# Supplementary material for: Gereizt und grübelnd?
Source: Atypon-hosted journal article supplement (doi:10.1026/0932-4089/a000389), 2022-03-11
Supplement: 0932-4089_a000389_esm2.pdf [file 0932-4089_a000389_esm2.pdf]

ESM 2.

*Voraussetzungsprüfungen zur Regressionsanalyse der Moderationshypothese „Nutzen x Führungskapital“*

| Modellvoraussetzung      | Testverfahren             | Ergebnis                                | <i>p</i> -Wert |
|--------------------------|---------------------------|-----------------------------------------|----------------|
| Normalverteilung         | Shapiro-Wilk-Test         | W = 0.98                                | .001           |
| Homoskedastizität        | Breusch-Pagan-Test        | BP = 0.74                               | .389           |
| Keine Autokorrelation    | Durbin-Watson-Test        | DW = 1.98                               | .871           |
| Linearität               | RESET-Test                | RESET = 0.63                            | .639           |
| Keine Multikollinearität | Variance Inflation Factor | VIF <sub>Nutzen</sub> = 15.00           |                |
|                          |                           | VIF <sub>Führungskapital</sub> = 5.34   |                |
|                          |                           | VIF <sub>Interaktionsterm</sub> = 24.55 |                |

*Anmerkung.* N = 213.
