# Supplementary material for: Gereizt und grübelnd?
Source: Atypon-hosted journal article supplement (doi:10.1026/0932-4089/a000389), 2022-03-11
Supplement: 0932-4089_a000389_esm3.pdf [file 0932-4089_a000389_esm3.pdf]

ESM 3

*Voraussetzungsprüfungen zur Regressionsanalyse der Moderationshypothese „Netzwerkkapital“*

| Modellvoraussetzung      | Testverfahren             | Ergebnis                                | p-Wert |
|--------------------------|---------------------------|-----------------------------------------|--------|
| Normalverteilung         | Shapiro-Wilk-Test         | W = 0.98                                | .011   |
| Homoskedastizität        | Breusch-Pagan-Test        | BP = 0.57                               | .449   |
| Keine Autokorrelation    | Durbin-Watson-Test        | DW = 1.98                               | .892   |
| Linearität               | RESET-Test                | RESET = 0.90                            | .462   |
| Keine Multikollinearität | Variance Inflation Factor | VIF <sub>Auswirkung</sub> = 15.33       |        |
|                          |                           | VIF <sub>Netzwerkkapital</sub> = 13.48  |        |
|                          |                           | VIF <sub>Interaktionsterm</sub> = 25.43 |        |

*Anmerkung.* N = 216.
