# Supplementary material for: Gereizt und grübelnd?
Source: Atypon-hosted journal article supplement (doi:10.1026/0932-4089/a000389), 2022-03-11
Supplement: 0932-4089_a000389_esm4.pdf [file 0932-4089_a000389_esm4.pdf]

ESM 4

*Voraussetzungsprüfungen zur Regressionsanalyse der Moderationshypothese „Nutzen x Wertekapital“*

| Modellvoraussetzung      | Testverfahren             | Ergebnis                                                                                                       | p-Wert |
|--------------------------|---------------------------|----------------------------------------------------------------------------------------------------------------|--------|
| Normalverteilung         | Shapiro-Wilk-Test         | W = 0.98                                                                                                       | .001   |
| Homoskedastizität        | Breusch-Pagan-Test        | BP = 3.99                                                                                                      | .046   |
| Keine Autokorrelation    | Durbin-Watson-Test        | DW = 1.92                                                                                                      | .553   |
| Linearität               | RESET-Test                | RESET = 1.38                                                                                                   | .243   |
| Keine Multikollinearität | Variance Inflation Factor | VIF <sub>Nutzen</sub> = 10.68<br>VIF <sub>Wertekapital</sub> = 6.28<br>VIF <sub>Interaktionsterm</sub> = 21.47 |        |

*Anmerkung.* N = 217.
